# Supplementary material
Source: Springer Nature journal article supplement (http://www.springermedizin.de/resource/supplementary/13014_2013_1056_MOESM3_ESM.pdf/9635210)
Supplement: MOESM3 [file 9635210]

**Jenkins**

Continuous Integration

**CMake**

Build System

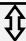

**Doxygen**

Documentation Tool

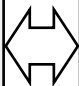

**Redmine**

Project Management

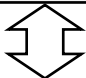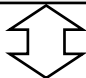

**Git**

Version Control System
